# Supplementary material for: TiO2 nanoparticles and bulk material stimulate human peripheral blood mononuclear cells
Source: PubMed Central journal article supplement — Food Chem Toxicol. 2014 Mar;65(100):63–9. doi: 10.1016/j.fct.2013.12.018 (PMC3969306; doi:10.1016/j.fct.2013.12.018), 2014-03
Supplement: mmc1.pdf [file mmc1.pdf]

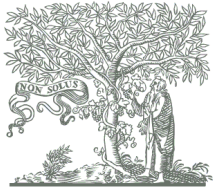

ELSEVIER

*Food and Chemical Toxicology*  
Conflict of Interest Policy

Supplement:  
Article Title: TiO<sub>2</sub> nanoparticles and bulk material  
stimulate human peripheral blood mononuclear cells

Author name: K.Becker, S.Schroecksnadel,  
S.Geisler, JM Gostner, H.Schennach, D.Fuchs

**Declarations**

*Food and Chemical Toxicology* requires that all authors sign a declaration of conflicting interests. If you have nothing to declare in any of these categories then this should be stated.

**Conflict of Interest**

A conflicting interest exists when professional judgement concerning a primary interest (such as patient's welfare or the validity of research) may be influenced by a secondary interest (such as financial gain or personal rivalry). It may arise for the authors when they have financial interest that may influence their interpretation of their results or those of others. Examples of potential conflicts of interest include employment, consultancies, stock ownership, honoraria, paid expert testimony, patent applications/registrations, and grants or other funding.

**Please state any competing interests**

There are no competing interests!

**Funding Source**

All sources of funding should also be acknowledged and you should declare any involvement of study sponsors in the study design; collection, analysis and interpretation of data; the writing of the manuscript; the decision to submit the manuscript for publication. If the study sponsors had no such involvement, this should be stated.

**Please state any sources of funding for your research**

Austrian Research Funds (project 25150-B13) and the European Commission (ERA NET–New INDIGO Program, NanoLINEN)

**Signature** (a scanned signature is acceptable,  
but each author must sign)

\_\_\_\_\_  
\_\_\_\_\_

**Print name**

\_\_\_\_\_  
\_\_\_\_\_

Kathrin Becker

Kathrin Becker

Sebastian Schroecksnadel

Sebastian Schroecksnadel

Simon Geisler

Simon Geisler

Marie Carriere

Marie Carriere

Johanna M. Gostner

Johanna M. Gostner

Harald Schennach

Harald Schennach

~~Nathalie Harlin-Boime~~

Nathalie Harlin-Boime

Dietmar Fuchs

Dietmar Fuchs
